# Supplementary material for: Leptin Signaling Affects Survival and Chemoresistance of Estrogen Receptor Negative Breast Cancer
Source: Int J Mol Sci. 2020 May 27;21(11):3794. doi: 10.3390/ijms21113794 (PMC7311967; doi:10.3390/ijms21113794)
Supplement: Supplementary file 1 [file ijms-21-03794-s001.zip]

Archive with 5 entries (5 files):
- Fig 1_Suppl.pdf
- Fig 2_Suppl.pdf
- Fig 3_Suppl.pdf
- Fig 4_Suppl.pdf
- Fig 5_Suppl.pdf
